# Supplementary material for: Change of Dietary and Lifestyle Habits during and after the COVID-19 Lockdown in Cyprus: An Analysis of Two Observational Studies
Source: MDPI journal article supplement (doi:10.3390/foods11141994), 2022-07-06
Supplement: s1 [file s1]

**Supplementary Table S1.** Olive oil consumption and alcohol intake among the first cross-sectional survey (during lockdown) and the second cross-sectional survey (post-lockdown) and for females and males separately.

|                                                                                                                                                                                                                                                                                                                                                                                                                                                   | Cross-sectional study                |                                    |                      | During lockdown (N = 1460) |                         |                      | Post-lockdown (N = 1043)   |                          |                      |
|---------------------------------------------------------------------------------------------------------------------------------------------------------------------------------------------------------------------------------------------------------------------------------------------------------------------------------------------------------------------------------------------------------------------------------------------------|--------------------------------------|------------------------------------|----------------------|----------------------------|-------------------------|----------------------|----------------------------|--------------------------|----------------------|
| Dietary habits                                                                                                                                                                                                                                                                                                                                                                                                                                    | During lockdown<br>(N = 1460, 58.3%) | Post-lockdown<br>(N = 1043, 41.7%) | p-value <sup>c</sup> | Female<br>(N = 875, 59.9%) | Male<br>(N = 57, 40.1%) | p-value <sup>d</sup> | Female<br>(N = 719, 68.9%) | Male<br>(N = 324, 31.1%) | p-value <sup>d</sup> |
| <b>Olive oil [N <sup>a</sup> (%)]</b>                                                                                                                                                                                                                                                                                                                                                                                                             |                                      |                                    |                      |                            |                         |                      |                            |                          |                      |
| Never                                                                                                                                                                                                                                                                                                                                                                                                                                             | 18 (1.2)                             | 14 (1.3)                           | <b>&lt;0.001</b>     | 13 (72.2)                  | 5 (27.8)                | <b>0.009</b>         | 10 (71.4)                  | 4 (28.6)                 | <b>0.001</b>         |
| Rarely                                                                                                                                                                                                                                                                                                                                                                                                                                            | 96 (6.6)                             | 119 (11.5)                         |                      | 67 (69.8)                  | 29 (30.2)               |                      | 91 (76.5)                  | 28 (23.5)                |                      |
| Less than 1 portion/week                                                                                                                                                                                                                                                                                                                                                                                                                          | 71 (4.9)                             | 67 (6.5)                           |                      | 41 (58.6)                  | 29 (41.4)               |                      | 44 (65.7)                  | 23 (34.3)                |                      |
| 1-3 portions/week                                                                                                                                                                                                                                                                                                                                                                                                                                 | 328 (22.5)                           | 299 (28.8)                         |                      | 190 (58.6)                 | 134 (41.4)              |                      | 185 (61.9)                 | 114 (38.1)               |                      |
| 3-5 portions/week                                                                                                                                                                                                                                                                                                                                                                                                                                 | 333 (22.8)                           | 226 (21.8)                         |                      | 176 (53.3)                 | 154 (46.7)              |                      | 146 (64.6)                 | 80 (35.4)                |                      |
| Daily                                                                                                                                                                                                                                                                                                                                                                                                                                             | 612 (42.0)                           | 313 (30.1)                         |                      | 388 (64.0)                 | 218 (36.0)              |                      | 239 (76.4)                 | 74 (23.6)                |                      |
| <b>Alcohol intake [N <sup>b</sup> (%)]</b>                                                                                                                                                                                                                                                                                                                                                                                                        |                                      |                                    |                      |                            |                         |                      |                            |                          |                      |
| <300 ml                                                                                                                                                                                                                                                                                                                                                                                                                                           | 1309 (91.1)                          | 891 (86.8)                         | <b>0.012</b>         | 833 (64.2)                 | 464 (35.8)              | <b>&lt;0.001</b>     | 651 (73.1)                 | 240 (26.9)               | <b>&lt;0.001</b>     |
| 300 ml                                                                                                                                                                                                                                                                                                                                                                                                                                            | 72 (5.0)                             | 75 (7.3)                           |                      | 16 (22.2)                  | 56 (77.8)               |                      | 31 (41.3)                  | 44 (58.7)                |                      |
| 400 ml                                                                                                                                                                                                                                                                                                                                                                                                                                            | 27 (1.9)                             | 29 (2.8)                           |                      | 5 (18.5)                   | 22 (81.5)               |                      | 13 (44.8)                  | 16 (55.2)                |                      |
| 500 ml                                                                                                                                                                                                                                                                                                                                                                                                                                            | 13 (0.9)                             | 21 (2.0)                           |                      | 2 (16.7)                   | 10 (83.3)               |                      | 7 (33.3)                   | 14 (66.7)                |                      |
| 600 ml                                                                                                                                                                                                                                                                                                                                                                                                                                            | 4 (0.3)                              | 3 (0.3)                            |                      | 0 (0.0)                    | 4 (100.0)               |                      | 1 (33.3)                   | 2 (66.7)                 |                      |
| >700 ml or 0 ml                                                                                                                                                                                                                                                                                                                                                                                                                                   | 12 (0.8)                             | 8 (0.8)                            |                      | 3 (27.3)                   | 8 (72.7)                |                      | 2 (25.0)                   | 6 (75.0)                 |                      |
| During and after lockdown respectively: <sup>a</sup> N = 1458 and 1038; <sup>b</sup> N = 1437 and 1027; <sup>c</sup> Differences between dietary habits among the first cross-sectional study and the second cross-sectional study were tested using chi2 test; <sup>d</sup> Differences between dietary habits of females and males were tested using chi2 test; Bold values indicate statistically significant associations ( <i>p</i> < 0.05). |                                      |                                    |                      |                            |                         |                      |                            |                          |                      |

**Supplementary Table S2.** Delivery frequency and coffee consumption among the first cross-sectional survey (during lockdown) and the second cross-sectional survey (post-lockdown) and for females and males separately.

|                                              | Cross-sectional study                |                                    |                              | During lockdown (N = 1460) |                         |                              | Post-lockdown (N = 1043)   |                          |                              |
|----------------------------------------------|--------------------------------------|------------------------------------|------------------------------|----------------------------|-------------------------|------------------------------|----------------------------|--------------------------|------------------------------|
| Dietary habits                               | During lockdown<br>(N = 1460, 58.3%) | Post-lockdown<br>(N = 1043, 41.7%) | <i>p</i> -value <sup>f</sup> | Female<br>(N = 875, 59.9%) | Male<br>(N = 57, 40.1%) | <i>p</i> -value <sup>g</sup> | Female<br>(N = 719, 68.9%) | Male<br>(N = 324, 31.1%) | <i>p</i> -value <sup>g</sup> |
| Delivery frequency [N <sup>a</sup> (%)]      |                                      |                                    |                              |                            |                         |                              |                            |                          |                              |
| Never/Rarely                                 | 626 (43.0)                           | 182 (17.5)                         | <0.001                       | 418 (67.5)                 | 201 (32.5)              | <0.001                       | 126 (69.2)                 | 56 (30.8)                | <0.001                       |
| 1-3 times per month                          | 513 (35.2)                           | 385 (37.0)                         |                              | 291 (57.1)                 | 219 (42.9)              |                              | 278 (72.2)                 | 107 (27.8)               |                              |
| 1-2 times per week                           | 269 (18.5)                           | 343 (33.0)                         |                              | 147 (55.1)                 | 120 (44.9)              |                              | 240 (70.0)                 | 103 (30.0)               |                              |
| 3-6 times per week                           | 37 (2.5)                             | 105 (10.1)                         |                              | 14 (37.8)                  | 23 (62.2)               |                              | 58 (55.2)                  | 47 (44.8)                |                              |
| 1 time per day                               | 9 (0.6)                              | 19 (1.8)                           |                              | 3 (37.5)                   | 5 (62.5)                |                              | 11 (57.9)                  | 8 (42.1)                 |                              |
| 2 times per day                              | 3 (0.2)                              | 6 (0.6)                            |                              | 1 (33.3)                   | 2 (66.7)                |                              | 3 (50.0)                   | 3 (50.0)                 |                              |
| Coffees per day [N <sup>b</sup> (%)]         |                                      |                                    |                              |                            |                         |                              |                            |                          |                              |
| 0                                            | 209 (14.3)                           | 169 (16.3)                         | 0.411                        | 136 (65.7)                 | 71 (34.3)               | 0.013                        | 119 (70.4)                 | 50 (29.6)                | <0.001                       |
| 1                                            | 352 (24.1)                           | 259 (24.9)                         |                              | 222 (63.1)                 | 130 (36.9)              |                              | 197 (76.1)                 | 62 (23.9)                |                              |
| 2                                            | 489 (33.5)                           | 353 (33.9)                         |                              | 301 (61.9)                 | 185 (38.1)              |                              | 256 (72.5)                 | 97 (27.5)                |                              |
| 3                                            | 259 (17.8)                           | 172 (16.5)                         |                              | 144 (56.7)                 | 110 (43.3)              |                              | 99 (57.6)                  | 73 (42.4)                |                              |
| 4                                            | 90 (6.2)                             | 48 (4.6)                           |                              | 46 (52.3)                  | 42 (47.7)               |                              | 28 (58.3)                  | 20 (41.7)                |                              |
| More than 4                                  | 60 (4.1)                             | 39 (3.8)                           |                              | 26 (44.1)                  | 33 (55.9)               |                              | 18 (46.2)                  | 21 (53.8)                |                              |
| Type of milk for coffee [N <sup>c</sup> (%)] |                                      |                                    |                              |                            |                         |                              |                            |                          |                              |
| No fat (0%)                                  | 94 (7.3)                             | 78 (9.2)                           | <0.001                       | 57 (62.0)                  | 35 (38.0)               | <0.001                       | 67 (85.9)                  | 11 (14.1)                | <0.001                       |
| Low fat (1.5%)                               | 478 (38.2)                           | 242 (28.3)                         |                              | 322 (68.1)                 | 151 (31.9)              |                              | 190 (78.5)                 | 52 (21.5)                |                              |
| Full fat                                     | 69 (5.5)                             | 67 (7.8)                           |                              | 32 (47.1)                  | 36 (52.9)               |                              | 41 (61.2)                  | 26 (38.8)                |                              |
| No lactose                                   | 111 (8.8)                            | 101 (11.8)                         |                              | 77 (69.4)                  | 34 (30.6)               |                              | 88 (87.1)                  | 13 (12.9)                |                              |
| Coconut                                      | 82 (6.4)                             | 25 (2.9)                           |                              | 52 (64.2)                  | 29 (35.8)               |                              | 22 (91.7)                  | 2 (8.3)                  |                              |
| Almond                                       | 46 (3.7)                             | 24 (2.8)                           |                              | 36 (78.3)                  | 10 (21.7)               |                              | 25 (100.0)                 | 0 (0.0)                  |                              |

[illegible]

**Supplementary Table S3.** Dietary habits among the first cross-sectional survey (during lockdown) and the second cross-sectional survey (post-lockdown) among physical activity categories.

|                                                 | During lockdown (N = 1460)                      |                                  |                      | Post-lockdown (N = 1043)                        |                                  |                      |
|-------------------------------------------------|-------------------------------------------------|----------------------------------|----------------------|-------------------------------------------------|----------------------------------|----------------------|
| Dietary habits                                  | Not adequately physical active (N = 496, 34.1%) | Physical active (N = 959, 65.9%) | p-value <sup>q</sup> | Not adequately physical active (N = 463, 44.5%) | Physical active (N = 578, 55.5%) | p-value <sup>q</sup> |
| <b>Non-refined cereals</b> [N <sup>a</sup> (%)] |                                                 |                                  |                      |                                                 |                                  |                      |
| Never                                           | 124 (25.0)                                      | 127 (13.2)                       | <0.001               | 125 (27.2)                                      | 71 (12.3)                        | <0.001               |
| 1-6 portions/week                               | 253 (51.0)                                      | 480 (50.1)                       |                      | 219 (47.6)                                      | 302 (52.3)                       |                      |
| 7-12 portions/week                              | 71 (14.3)                                       | 221 (23.0)                       |                      | 70 (15.2)                                       | 106 (18.3)                       |                      |
| 13-18 portions/week                             | 32 (6.5)                                        | 77 (8.0)                         |                      | 24 (5.2)                                        | 61 (10.5)                        |                      |
| 19-31 portions/week                             | 15 (3.0)                                        | 40 (4.2)                         |                      | 16 (3.5)                                        | 25 (4.3)                         |                      |
| >32 portions/week                               | 1 (0.2)                                         | 14 (1.5)                         |                      | 6 (1.3)                                         | 13 (2.3)                         |                      |
| <b>Fruits</b> [N <sup>b</sup> (%)]              |                                                 |                                  |                      |                                                 |                                  |                      |
| Never                                           | 24 (4.9)                                        | 38 (4.0)                         | <0.001               | 44 (9.5)                                        | 23 (4.0)                         | <0.001               |
| 1-4 portions/week                               | 204 (41.3)                                      | 261 (27.2)                       |                      | 192 (41.5)                                      | 174 (30.1)                       |                      |
| 5-8 portions/week                               | 137 (27.7)                                      | 256 (26.7)                       |                      | 115 (24.8)                                      | 155 (26.9)                       |                      |
| 9-15 portions/week                              | 81 (16.4)                                       | 228 (23.8)                       |                      | 59 (12.7)                                       | 125 (21.7)                       |                      |
| 16-21 portions/week                             | 28 (5.7)                                        | 101 (10.5)                       |                      | 29 (6.3)                                        | 58 (10.0)                        |                      |
| >22 portions/week                               | 20 (4.0)                                        | 74 (7.8)                         |                      | 24 (5.2)                                        | 42 (7.3)                         |                      |
| <b>Vegetables</b> [N <sup>c</sup> (%)]          |                                                 |                                  |                      |                                                 |                                  |                      |
| Never                                           | 18 (3.6)                                        | 21 (2.2)                         | <0.001               | 16 (3.5)                                        | 14 (2.4)                         | 0.017                |
| 1-6 portions/week                               | 224 (45.3)                                      | 283 (29.5)                       |                      | 196 (42.3)                                      | 186 (32.2)                       |                      |
| 7-12 portions/week                              | 147 (29.8)                                      | 317 (33.1)                       |                      | 117 (25.3)                                      | 169 (29.2)                       |                      |
| 13-20 portions/week                             | 60 (12.2)                                       | 209 (21.8)                       |                      | 63 (13.6)                                       | 94 (16.3)                        |                      |
| 21-32 portions/week                             | 30 (6.1)                                        | 90 (9.4)                         |                      | 44 (9.5)                                        | 71 (12.3)                        |                      |
| >33 portions/week                               | 15 (3.0)                                        | 38 (4.0)                         |                      | 27 (5.8)                                        | 44 (7.6)                         |                      |
| <b>Legumes/pulses</b> [N <sup>d</sup> (%)]      |                                                 |                                  |                      |                                                 |                                  |                      |
| Never                                           | 24 (4.8)                                        | 52 (5.3)                         | 0.158                | 60 (13.0)                                       | 41 (7.1)                         | 0.001                |

|                                            |            |            |       |            |            |        |
|--------------------------------------------|------------|------------|-------|------------|------------|--------|
| Less than 1 portion/week                   | 89 (17.9)  | 128 (13.5) |       | 109 (23.6) | 113 (19.7) |        |
| 1-2 portions/week                          | 250 (50.5) | 475 (49.5) |       | 217 (47.0) | 291 (50.6) |        |
| 3-4 portions/week                          | 116 (23.4) | 262 (27.3) |       | 61 (13.2)  | 109 (19.0) |        |
| 5-6 portions/week                          | 12 (2.4)   | 33 (3.5)   |       | 14 (3.0)   | 14 (2.4)   |        |
| >6 portions/week                           | 5 (1.0)    | 9 (0.9)    |       | 1 (0.2)    | 7 (1.2)    |        |
| <b>Potatoes</b> [ $N^e$ (%)]               |            |            |       |            |            |        |
| Never                                      | 18 (3.6)   | 66 (6.9)   | 0.005 | 12 (2.6)   | 55 (9.5)   | <0.001 |
| 1-4 portions/week                          | 368 (74.2) | 728 (76.0) |       | 288 (62.6) | 372 (64.5) |        |
| 5-8 portions/week                          | 68 (13.7)  | 115 (12.0) |       | 74 (16.1)  | 84 (14.6)  |        |
| 9-12 portions/week                         | 24 (4.9)   | 37 (3.9)   |       | 46 (10.0)  | 32 (5.5)   |        |
| 13-18 portions/week                        | 13 (2.6)   | 9 (0.9)    |       | 26 (5.7)   | 25 (4.3)   |        |
| >18 portions/week                          | 5 (1.0)    | 3 (0.3)    |       | 14 (3.0)   | 9 (1.6)    |        |
| <b>Fish</b> [ $N^f$ (%)]                   |            |            |       |            |            |        |
| Never                                      | 55 (11.1)  | 85 (8.9)   | 0.120 | 85 (18.3)  | 64 (11.1)  | <0.001 |
| Less than 1 portion/week                   | 174 (35.1) | 288 (30.0) |       | 193 (41.7) | 204 (35.4) |        |
| 1-2 portions/week                          | 211 (42.5) | 458 (47.8) |       | 137 (29.6) | 228 (39.5) |        |
| 3-4 portions/week                          | 44 (8.9)   | 108 (11.3) |       | 41 (8.9)   | 63 (10.9)  |        |
| 5-6 portions/week                          | 9 (1.8)    | 16 (1.7)   |       | 7 (1.5)    | 15 (2.6)   |        |
| >6 portions/week                           | 3 (0.6)    | 3 (0.3)    |       | 0 (0.0)    | 3 (0.5)    |        |
| <b>Meat and meat products</b> [ $N^g$ (%)] |            |            |       |            |            |        |
| 1 or less than 1 portion/week              | 213 (43.3) | 457 (47.8) | 0.085 | 198 (43.2) | 278 (48.4) | 0.105  |
| 2-3 portions/week                          | 152 (30.9) | 316 (33.0) |       | 137 (29.9) | 174 (30.3) |        |
| 4-5 portions/week                          | 79 (16.0)  | 106 (11.1) |       | 69 (15.1)  | 68 (11.9)  |        |
| 6-7 portions/week                          | 27 (5.5)   | 45 (4.7)   |       | 26 (5.7)   | 35 (6.1)   |        |
| 8-10 portions/week                         | 17 (3.5)   | 24 (2.5)   |       | 18 (3.9)   | 15 (2.6)   |        |
| >10 portions/week                          | 4 (0.8)    | 9 (0.9)    |       | 10 (2.2)   | 4 (0.7)    |        |
| <b>Poultry</b> [ $N^h$ (%)]                |            |            |       |            |            |        |
| 3 or less than 3 portions/week             | 291 (59.3) | 518 (54.2) | 0.180 | 199 (43.5) | 269 (46.9) | 0.048  |
| 4-5 portions/week                          | 113 (23.0) | 239 (25.0) |       | 96 (21.0)  | 145 (25.3) |        |

|                                                      |            |            |       |            |            |       |
|------------------------------------------------------|------------|------------|-------|------------|------------|-------|
| 5-6 portions/week                                    | 38 (7.7)   | 96 (10.0)  |       | 62 (13.6)  | 57 (9.9)   |       |
| 7-8 portions/week                                    | 30 (6.1)   | 61 (6.4)   |       | 43 (9.4)   | 56 (9.8)   |       |
| 9-10 portions/week                                   | 16 (3.3)   | 25 (2.6)   |       | 40 (8.8)   | 29 (5.1)   |       |
| >10 portions/week                                    | 3 (0.6)    | 17 (1.8)   |       | 17 (3.7)   | 17 (3.0)   |       |
| Full-fat dairy products [ <i>N</i> <sup>i</sup> (%)] |            |            |       |            |            |       |
| 10 or less than 10 portions/week                     | 328 (66.5) | 663 (69.3) | 0.365 | 272 (59.1) | 395 (68.7) | 0.001 |
| 11-15 portions/week                                  | 94 (19.1)  | 157 (16.4) |       | 84 (18.2)  | 91 (15.8)  |       |
| 16-20 portions/week                                  | 31 (6.3)   | 76 (7.9)   |       | 32 (7.0)   | 44 (7.6)   |       |
| 21-28 portions/week                                  | 23 (4.7)   | 31 (3.2)   |       | 30 (6.5)   | 24 (4.2)   |       |
| 29-30 portions/week                                  | 10 (2.0)   | 14 (1.5)   |       | 27 (5.9)   | 13 (2.3)   |       |
| >30 portions/week                                    | 7 (1.4)    | 16 (1.7)   |       | 15 (3.3)   | 7 (1.4)    |       |
| Olive oil [ <i>N</i> <sup>i</sup> (%)]               |            |            |       |            |            |       |
| Never                                                | 4 (0.8)    | 14 (1.5)   | 0.169 | 7 (1.5)    | 7 (1.2)    | 0.032 |
| Rarely                                               | 33 (4.7)   | 63 (6.6)   |       | 62 (13.5)  | 57 (9.9)   |       |
| Less than 1 portion/week                             | 24 (4.8)   | 46 (4.8)   |       | 32 (6.9)   | 35 (6.1)   |       |
| 1-3 portions/week                                    | 131 (26.4) | 196 (20.5) |       | 148 (32.0) | 151 (26.3) |       |
| 3-5 portions/week                                    | 109 (22.0) | 223 (23.3) |       | 95 (20.6)  | 131 (22.9) |       |
| Daily                                                | 195 (39.3) | 415 (43.3) |       | 118 (25.5) | 193 (33.6) |       |
| Alcohol intake [ <i>N</i> <sup>k</sup> (%)]          |            |            |       |            |            |       |
| <300 ml                                              | 443 (91.3) | 861 (90.9) | 0.654 | 377 (83.4) | 512 (89.4) | 0.004 |
| 300 ml                                               | 27 (5.6)   | 45 (4.8)   |       | 45 (10.0)  | 30 (5.2)   |       |
| 400 ml                                               | 7 (1.5)    | 20 (2.1)   |       | 14 (3.1)   | 15 (2.6)   |       |
| 500 ml                                               | 4 (0.8)    | 9 (1.0)    |       | 12 (2.6)   | 9 (1.6)    |       |
| 600 ml                                               | 0 (0.0)    | 4 (0.4)    |       | 3 (0.7)    | 0 (0.0)    |       |
| >700 ml or 0 ml                                      | 4 (0.8)    | 8 (0.8)    |       | 1 (0.2)    | 7 (1.2)    |       |
| Delivery frequency [ <i>N</i> <sup>l</sup> (%)]      |            |            |       |            |            |       |
| Never/Rarely                                         | 208 (42.1) | 415 (43.3) | 0.890 | 73 (15.9)  | 109 (18.9) | 0.170 |
| 1-3 times per month                                  | 171 (34.6) | 340 (35.5) |       | 164 (35.6) | 221 (38.2) |       |
| 1-2 times per week                                   | 99 (20.1)  | 170 (17.8) |       | 157 (34.1) | 184 (31.8) |       |



included evaporate, rice and goat; <sup>p</sup>  $N = 1245$  and  $402$ ; <sup>a</sup> Differences between dietary habits among physical activity groups were tested using chi2 test; Bold values indicate statistically significant associations ( $p < 0.05$ ).
